# Supplementary material for: Innate recognition of water bodies in echolocating bats
Source: PubMed Central journal article supplement — Nat Commun. 2010 Nov 2;1:107–. doi: 10.1038/ncomms1110 (PMC3060641; doi:10.1038/ncomms1110), 2010-11-02
Supplement: ncomms1110-s1.pdf [file ncomms1110-s1.pdf]

**Greif, S., Siemers B.M. – Innate recognition of water bodies in echolocating bats**

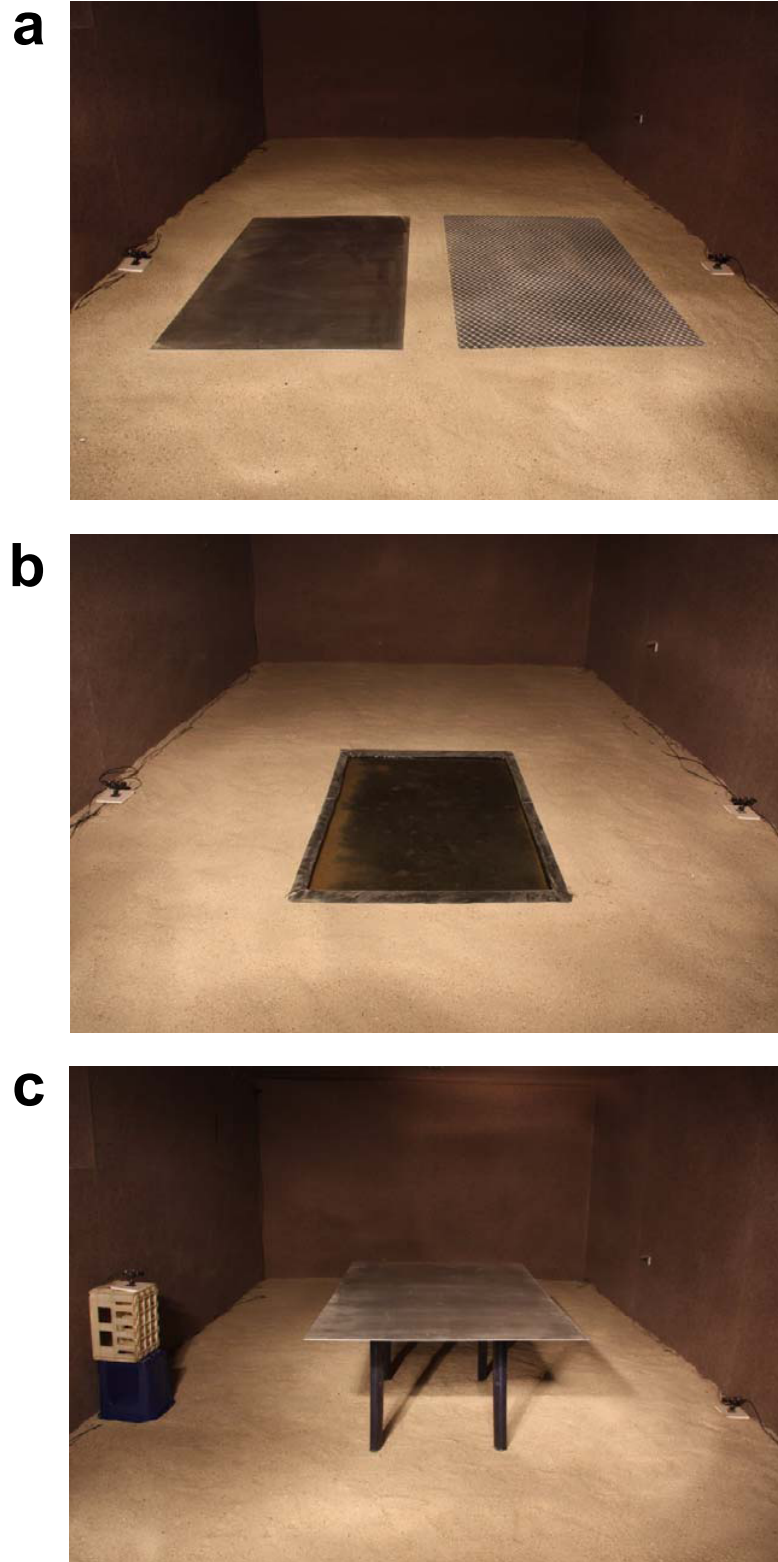

**Supplementary Figure S1 – Flight room set up.** In (a) the plate set up (here with metal) is depicted, on the left the smooth, on the right the textured plate. In (b) the water pool is shown which was hidden underneath the plates in (a). In (c) the smooth metal plate is placed on a table.
